# Supplementary material for: Plant microbiome analysis after Metarhizium amendment reveals increases in abundance of plant growth-promoting organisms and maintenance of disease-suppressive soil
Source: PubMed Central journal article supplement (PMC7147777; doi:10.1371/journal.pone.0231150), 2020-04-10
Supplement: pone.0231150.s002.pdf [file pone.0231150.s002.pdf]

## **S2 File. Interactive data analysis website.**

Interactive data analysis website for common bean plant (*Phaseolus vulgaris*) root and soil microbiome alterations, after *Metarhizium robertsii* soil amendment. The generalized linear model (GLM) and Welch's t-tests can be adjusted for a desired P value, as well as for a particular factor of interest. A specific bacterial or fungal taxon can be selected to visualize the box plot of relative abundance and the corresponding significance testing.

<https://metarhiz-microbiome.shinyapps.io/shiny3/>

Available information for download:

- Raw reads (also available from Short Read Archive (NCBI), accession: PRJNA558088)
- OTU abundance tables for bacterial and fungal: phylum, family, and genus.
- R-script used for complete analysis
