# Supplementary material for: Plant microbiome analysis after Metarhizium amendment reveals increases in abundance of plant growth-promoting organisms and maintenance of disease-suppressive soil
Source: PubMed Central journal article supplement (PMC7147777; doi:10.1371/journal.pone.0231150), 2020-04-10
Supplement: pone.0231150.s004.pdf [file pone.0231150.s004.pdf]

**S1 Table. Experimental treatment setup for microbiome analysis.**

| Treatment | Bean | <i>Metarhizium</i> | Insect | Total Pots<br>(pooled samples) | Total Root<br>Samples | Total Soil<br>Samples |
|-----------|------|--------------------|--------|--------------------------------|-----------------------|-----------------------|
| M+I+      | +    | +                  | +      | 9 (3)                          | 3                     | 3                     |
| M+I-      | +    | +                  | -      | 9 (3)                          | 3                     | 3                     |
| M-I+      | +    | -                  | +      | 9 (3)                          | 3                     | 3                     |
| M-I-      | +    | -                  | -      | 9 (3)                          | 3                     | 3                     |
| Soil      | -    | -                  | -      | 9 (3)                          | N/A                   | 3                     |
