# Supplementary material for: Plant microbiome analysis after Metarhizium amendment reveals increases in abundance of plant growth-promoting organisms and maintenance of disease-suppressive soil
Source: PubMed Central journal article supplement (PMC7147777; doi:10.1371/journal.pone.0231150), 2020-04-10
Supplement: pone.0231150.s005.pdf [file pone.0231150.s005.pdf]

**S2 Table. OTUs enriched in root and rhizosphere soil.**

| Target | Location    | Effect  | Adj-P                 | OTU     | Taxonomic classification      |
|--------|-------------|---------|-----------------------|---------|-------------------------------|
| Fungi  | Rhizosphere | 3.43    | <0.001                | Otu0004 | s_Hygrocybe_sp                |
|        | Soil        | 2.97    | <0.001                | Otu0029 | k_Fungi_un.                   |
|        |             | 2.54    | <0.001                | Otu0030 | k_Fungi_un.                   |
|        |             | 2.50    | <0.001                | Otu0027 | k_Fungi_un.                   |
|        |             | 2.39    | <0.001                | Otu0015 | c_Eurotiomycetes_un.          |
|        |             | 2.39    | <0.001                | Otu0021 | s_Spizellomyces_sp            |
|        |             | 2.39    | <0.001                | Otu0020 | o_Agaricales_un.              |
|        |             | 2.22    | 0.001                 | Otu0028 | s_Staphylotrichum_coccosporum |
|        |             | 2.17    | <0.001                | Otu0074 | k_Fungi_un.                   |
|        |             | 2.00    | <0.001                | Otu0036 | p_Ascomycota_un.              |
|        |             | 1.80    | 0.001                 | Otu0040 | s_Spizellomyces_sp            |
|        |             | 1.79    | <0.001                | Otu0052 | k_Fungi_un.                   |
|        |             | 1.76    | 0.002                 | Otu0104 | p_Basidiomycota_un.           |
|        |             | 1.76    | <0.001                | Otu0075 | s_Hygrocybe_glutinipes        |
|        |             | 1.63    | 0.002                 | Otu0116 | k_Fungi_un.                   |
|        |             | 1.60    | 0.002                 | Otu0091 | s_Orbiliomycetes_sp           |
|        |             | 1.54    | 0.002                 | Otu0114 | c_Sordariomycetes_un.         |
|        |             | 1.50    | 0.001                 | Otu0047 | k_Fungi_un.                   |
|        |             | 1.46    | 0.002                 | Otu0106 | k_Fungi_un.                   |
|        |             | 1.45    | 0.008                 | Otu0082 | c_Agaricomycetes_un.          |
|        |             | 1.40    | 0.006                 | Otu0022 | g_Mortierella_un.             |
|        |             | 1.38    | 0.004                 | Otu0129 | k_Fungi_un.                   |
|        |             | 1.37    | 0.004                 | Otu0152 | k_Fungi_un.                   |
|        |             | 1.34    | 0.006                 | Otu0205 | k_Fungi_un.                   |
|        |             | 1.31    | 0.006                 | Otu0220 | k_Fungi_un.                   |
|        |             | 1.29    | 0.013                 | Otu0006 | g_Mortierella_un.             |
|        |             | 1.28    | 0.002                 | Otu0043 | s_Trichoglossum_sp            |
|        |             | 1.27    | 0.010                 | Otu0123 | k_Fungi_un.                   |
|        |             | 1.26    | 0.003                 | Otu0065 | f_Ustilaginaceae_un.          |
|        |             | 1.25    | 0.006                 | Otu0230 | k_Fungi_un.                   |
|        |             | 1.24    | 0.004                 | Otu0101 | k_Fungi_un.                   |
|        |             | 1.24    | 0.006                 | Otu0174 | k_Fungi_un.                   |
|        |             | 1.20    | 0.005                 | Otu0133 | k_Fungi_un.                   |
| 1.19   | 0.010       | Otu0194 | k_Fungi_un.           |         |                               |
| 1.17   | 0.018       | Otu0025 | f_Chaetomiaceae_un.   |         |                               |
| 1.17   | 0.009       | Otu0229 | k_Fungi_un.           |         |                               |
| 1.17   | 0.007       | Otu0080 | p_Ascomycota_un.      |         |                               |
| 1.14   | 0.017       | Otu0084 | p_Ascomycota_un.      |         |                               |
| 1.13   | 0.011       | Otu0056 | c_Eurotiomycetes_un.  |         |                               |
| 1.12   | 0.007       | Otu0060 | g_Staphylotrichum_un. |         |                               |
| 1.11   | 0.005       | Otu0035 | k_Fungi_un.           |         |                               |
| 1.07   | 0.037       | Otu0012 | s_Mortierella_exigua  |         |                               |
| 1.05   | 0.011       | Otu0203 | p_Ascomycota_un.      |         |                               |
| 1.04   | 0.031       | Otu0071 | s_Eurotiomycetes_sp   |         |                               |

| Target | Location    | Effect  | Adj-P                                | OTU     | Taxonomic classification             |
|--------|-------------|---------|--------------------------------------|---------|--------------------------------------|
| Fungi  | Rhizosphere | 1.04    | 0.029                                | Otu0090 | s__Geoglossales_sp                   |
|        | Soil        | 1.01    | 0.034                                | Otu0177 | p__Ascomycota_un.                    |
| Fungi  | Root        | -1.00   | 0.014                                | Otu0350 | s__Ceratobasidiaceae_sp              |
|        |             | -1.01   | 0.022                                | Otu0332 | p__Ascomycota_un.                    |
|        |             | -1.06   | 0.020                                | Otu0270 | o__Agaricales_un.                    |
|        |             | -1.13   | 0.007                                | Otu0111 | s__Chaetothyriaceae_sp               |
|        |             | -1.18   | 0.017                                | Otu0377 | s__Trichoderma_longibrachiatum       |
|        |             | -1.21   | 0.013                                | Otu0153 | s__Laetisaria_arvalis                |
|        |             | -1.22   | 0.005                                | Otu0086 | s__Marasmius_curreyi                 |
|        |             | -1.24   | 0.007                                | Otu0240 | s__Acremonium_stromaticum            |
|        |             | -1.26   | 0.005                                | Otu0273 | f__Helotiales_fam_Incertae_sedis_un. |
|        |             | -1.31   | 0.005                                | Otu0416 | s__Ophiosphaerella_korrae            |
|        |             | -1.42   | 0.016                                | Otu0050 | s__Gibberella_tricineta              |
|        |             | -1.46   | 0.005                                | Otu0584 | s__Metarhizium_marquandii            |
|        |             | -1.48   | 0.002                                | Otu0241 | s__Flagelloscypha_minutissima        |
|        |             | -1.52   | 0.002                                | Otu0368 | k__Fungi_un.                         |
|        |             | -1.56   | 0.008                                | Otu0275 | s__Codinaea_acaciae                  |
|        |             | -1.56   | 0.006                                | Otu0108 | s__Gibberella_intricans              |
|        |             | -1.59   | 0.002                                | Otu0199 | g__Periconia_un.                     |
|        |             | -1.62   | 0.004                                | Otu0122 | s__Xylariales_sp                     |
|        |             | -1.67   | 0.008                                | Otu0151 | g__Fusarium_un.                      |
|        |             | -1.67   | 0.003                                | Otu0443 | k__Fungi_un.                         |
|        |             | -1.72   | 0.008                                | Otu0057 | s__Paraphoma_chrysanthemicola        |
|        |             | -1.79   | 0.001                                | Otu0250 | s__Roussoella_hysterioides           |
|        |             | -1.98   | <0.001                               | Otu0209 | s__Ilyonectria_robusta               |
|        |             | -2.00   | <0.001                               | Otu0202 | k__Fungi_un.                         |
|        |             | -2.03   | 0.002                                | Otu0163 | k__Fungi_un.                         |
|        |             | -2.06   | 0.023                                | Otu0081 | s__Gibellulopsis_nigrescens          |
|        |             | -2.13   | <0.001                               | Otu0544 | g__Fusarium_un.                      |
|        |             | -2.21   | <0.001                               | Otu0014 | o__Pleosporales_un.                  |
|        |             | -2.22   | 0.008                                | Otu0164 | s__Cylindrocarpon_sp                 |
|        |             | -2.53   | 0.001                                | Otu0373 | p__Ascomycota_un.                    |
|        |             | -2.65   | 0.036                                | Otu0010 | s__Fusarium_solani                   |
|        |             | -2.66   | <0.001                               | Otu0083 | s__Dactylonectria_anthuriicola       |
|        |             | -2.94   | <0.001                               | Otu0165 | g__Fusarium_un.                      |
|        |             | -2.96   | 0.007                                | Otu0058 | o__Xylariales_un.                    |
| -3.08  | 0.003       | Otu0062 | s__Ilyonectria_macrodidyma           |         |                                      |
| -3.12  | <0.001      | Otu0185 | s__Fusarium_oxysporum                |         |                                      |
| -3.30  | <0.001      | Otu0046 | k__Fungi_un.                         |         |                                      |
| -3.36  | 0.033       | Otu0039 | s__Fusarium_solani                   |         |                                      |
| -3.97  | 0.035       | Otu0005 | s__Clonostachys_rosea                |         |                                      |
| -4.61  | 0.013       | Otu0011 | f__Helotiales_fam_Incertae_sedis_un. |         |                                      |
| -6.16  | 0.024       | Otu0001 | k__Fungi_un.                         |         |                                      |
| -6.94  | 0.001       | Otu0002 | s__Fusarium_oxysporum                |         |                                      |

| Target   | Location            | Effect   | Adj-P                       | OTU      | Taxonomic classification          |
|----------|---------------------|----------|-----------------------------|----------|-----------------------------------|
| Bacteria | Rhizosphere<br>Soil | 1.96     | <0.001                      | Otu00002 | o_iii1-15_un.                     |
|          |                     | 1.21     | 0.010                       | Otu00027 | f_Ellin5301_un.                   |
|          |                     | 1.20     | 0.011                       | Otu00024 | o_Myxococcales_un.                |
|          |                     | 1.19     | 0.008                       | Otu00070 | f_0319-6A21_un.                   |
|          |                     | 1.19     | 0.014                       | Otu00013 | o_SC-I-84_un.                     |
|          |                     | 1.15     | 0.011                       | Otu00062 | f_0319-6A21_un.                   |
|          |                     | 1.09     | 0.013                       | Otu00056 | f_C111_un.                        |
|          |                     | 1.07     | 0.012                       | Otu00007 | o_iii1-15_un.                     |
|          |                     | 1.05     | 0.022                       | Otu00072 | o_SC-I-84_un.                     |
| Bacteria | Root                | -1.06    | 0.012                       | Otu00415 | g_Dyadobacter_un.                 |
|          |                     | -1.10    | 0.015                       | Otu00102 | s_Serratia_marcescens             |
|          |                     | -1.22    | 0.006                       | Otu00182 | g_Olivibacter_un.                 |
|          |                     | -1.23    | 0.020                       | Otu00544 | f_Cytophagaceae_un.               |
|          |                     | -1.24    | 0.008                       | Otu00111 | g_Pedobacter_un.                  |
|          |                     | -1.31    | 0.003                       | Otu00011 | g_DA101_un.                       |
|          |                     | -1.32    | 0.004                       | Otu00484 | f_Chitinophagaceae_un.            |
|          |                     | -1.35    | 0.005                       | Otu00594 | f_Chitinophagaceae_un.            |
|          |                     | -1.36    | 0.011                       | Otu00411 | s_Microbacterium_chocolatum       |
|          |                     | -1.37    | 0.014                       | Otu00082 | g_Pedobacter_un.                  |
|          |                     | -1.38    | 0.003                       | Otu00064 | g_Lysobacter_un.                  |
|          |                     | -1.40    | 0.012                       | Otu00552 | s_Bosea_genosp.                   |
|          |                     | -1.46    | 0.002                       | Otu00257 | g_Dyadobacter_un.                 |
|          |                     | -1.46    | <0.001                      | Otu00012 | s_Flavobacterium_succinicans      |
|          |                     | -1.55    | 0.015                       | Otu00455 | f_Micromonosporaceae_un.          |
|          |                     | -1.55    | 0.004                       | Otu00395 | g_Aminobacter_un.                 |
|          |                     | -1.55    | 0.002                       | Otu00260 | s_Flavobacterium_succinicans      |
|          |                     | -1.60    | 0.006                       | Otu00310 | f_Sphingobacteriaceae_un.         |
|          |                     | -1.61    | 0.002                       | Otu00261 | f_Sphingomonadaceae_un.           |
|          |                     | -1.62    | <0.001                      | Otu00053 | g_Chryseobacterium_un.            |
|          |                     | -1.63    | <0.001                      | Otu00126 | s_Arthrobacter_psychrolactophilus |
|          |                     | -1.68    | <0.001                      | Otu00001 | g_DA101_un.                       |
|          |                     | -1.70    | 0.001                       | Otu00569 | s_Duganella_nigrescens            |
|          |                     | -1.73    | 0.002                       | Otu00568 | f_Chitinophagaceae_un.            |
|          |                     | -1.74    | <0.001                      | Otu00289 | f_Oxalobacteraceae_un.            |
|          |                     | -1.78    | 0.001                       | Otu00550 | g_Chitinophaga_un.                |
|          |                     | -1.80    | <0.001                      | Otu00158 | g_Agrobacterium_un.               |
|          |                     | -1.83    | <0.001                      | Otu00117 | s_Chitinophaga_arvensicola        |
|          |                     | -1.85    | <0.001                      | Otu00041 | f_Enterobacteriaceae_un.          |
|          |                     | -1.86    | 0.002                       | Otu00483 | g_Pedobacter_un.                  |
| -1.88    | <0.001              | Otu00474 | f_Chitinophagaceae_un.      |          |                                   |
| -1.95    | <0.001              | Otu00486 | f_Chitinophagaceae_un.      |          |                                   |
| -1.95    | <0.001              | Otu00236 | s_Luteibacter_rhizovicianus |          |                                   |
| -1.99    | <0.001              | Otu00133 | g_Kribbella_un.             |          |                                   |
| -2.12    | <0.001              | Otu00457 | g_Promicromonospora_un.     |          |                                   |

| Target   | Location | Effect | Adj-P  | OTU      | Taxonomic classification       |
|----------|----------|--------|--------|----------|--------------------------------|
| Bacteria | Root     | -2.13  | <0.001 | Otu00078 | g_Ochrobactrum_un.             |
|          |          | -2.15  | <0.001 | Otu00383 | f_Cytophagaceae_un.            |
|          |          | -2.20  | 0.001  | Otu00197 | g_Achromobacter_un.            |
|          |          | -2.21  | <0.001 | Otu00206 | g_Labrys_un.                   |
|          |          | -2.22  | <0.001 | Otu00025 | f_Comamonadaceae_un.           |
|          |          | -2.23  | <0.001 | Otu00386 | k_Bacteria_un.                 |
|          |          | -2.23  | <0.001 | Otu00138 | s_Acinetobacter_rhizosphaerae  |
|          |          | -2.32  | <0.001 | Otu00085 | s_Bacillus_flexus              |
|          |          | -2.43  | <0.001 | Otu00431 | g_Dyadobacter_un.              |
|          |          | -2.46  | <0.001 | Otu00370 | g_Niastella_un.                |
|          |          | -2.49  | <0.001 | Otu00141 | g_Dyadobacter_un.              |
|          |          | -2.62  | <0.001 | Otu00513 | o_Actinomycetales_un.          |
|          |          | -2.64  | <0.001 | Otu00337 | o_Actinomycetales_un.          |
|          |          | -2.64  | <0.001 | Otu00460 | s_Duganella_nigrescens         |
|          |          | -2.65  | <0.001 | Otu00029 | g_Yersinia_un.                 |
|          |          | -2.65  | <0.001 | Otu00023 | g_Novosphingobium_un.          |
|          |          | -2.69  | <0.001 | Otu00080 | g_Mycobacterium_un.            |
|          |          | -2.74  | <0.001 | Otu00054 | g_Sphingomonas_un.             |
|          |          | -2.79  | <0.001 | Otu00336 | g_Streptomyces_un.             |
|          |          | -2.79  | <0.001 | Otu00156 | s_Burkholderia_bryophila       |
|          |          | -2.80  | <0.001 | Otu00280 | f_Actinosynnemataceae_un.      |
|          |          | -2.81  | <0.001 | Otu00017 | g_Ochrobactrum_un.             |
|          |          | -2.82  | <0.001 | Otu00305 | f_Sphingobacteriaceae_un.      |
|          |          | -2.95  | <0.001 | Otu00442 | o_Rhizobiales_un.              |
|          |          | -2.96  | <0.001 | Otu00229 | s_Glycomyces_harbinensis       |
|          |          | -3.00  | <0.001 | Otu00036 | s_Stenotrophomonas_retroflexus |
|          |          | -3.13  | <0.001 | Otu00003 | s_Sphingobacterium_multivorum  |
|          |          | -3.23  | <0.001 | Otu00096 | f_Sphingobacteriaceae_un.      |
|          |          | -3.27  | <0.001 | Otu00060 | f_Sphingobacteriaceae_un.      |
|          |          | -3.37  | <0.001 | Otu00108 | g_Arthrobacter_un.             |
|          |          | -3.39  | <0.001 | Otu00168 | g_Chitinophaga_un.             |
|          |          | -3.61  | <0.001 | Otu00149 | g_Mesorhizobium_un.            |
|          |          | -3.64  | <0.001 | Otu00219 | f_Sphingobacteriaceae_un.      |
|          |          | -3.99  | <0.001 | Otu00039 | g_Pseudomonas_un.              |
|          |          | -4.01  | <0.001 | Otu00015 | f_Comamonadaceae_un.           |
|          |          | -4.17  | <0.001 | Otu00032 | s_Methylotenera_mobilis        |
|          |          | -4.18  | <0.001 | Otu00129 | g_Dyadobacter_un.              |
|          |          | -4.20  | <0.001 | Otu00218 | g_Amycolatopsis_un.            |
|          |          | -4.33  | <0.001 | Otu00083 | s_Caulobacter_henricii         |
|          |          | -4.93  | <0.001 | Otu00066 | f_Comamonadaceae_un.           |
|          |          | -4.98  | <0.001 | Otu00016 | g_Bradyrhizobium_un.           |
|          |          | -5.13  | <0.001 | Otu00018 | g_Agrobacterium_un.            |
|          |          | -5.30  | <0.001 | Otu00042 | g_Streptomyces_un.             |
|          |          | -5.48  | <0.001 | Otu00009 | f_Oxalobacteraceae_un.         |
|          |          | -6.23  | <0.001 | Otu00008 | g_Streptomyces_un.             |

| Target   | Location | Effect | Adj- <i>P</i> | OTU      | Taxonomic classification  |
|----------|----------|--------|---------------|----------|---------------------------|
| Bacteria | Root     | -6.67  | <0.001        | Otu00010 | g_Niastella_un.           |
|          |          | -7.07  | <0.001        | Otu00005 | f_Oxalobacteraceae_un.    |
|          |          | -7.36  | <0.001        | Otu00021 | s_Rhizobium_leguminosarum |
|          |          | -8.03  | <0.001        | Otu00004 | s_Streptomyces_mirabilis  |

Note: Enriched OTUs were determined by GLM analysis. A positive effect indicates OTU is enriched in soil, a negative effect indicates OTU is enriched in the root. Adj-*P* = Benjamini-Hochberg adjusted P value; un. = unclassified.
