# Supplementary material for: Plant microbiome analysis after Metarhizium amendment reveals increases in abundance of plant growth-promoting organisms and maintenance of disease-suppressive soil
Source: PubMed Central journal article supplement (PMC7147777; doi:10.1371/journal.pone.0231150), 2020-04-10
Supplement: pone.0231150.s006.pdf [file pone.0231150.s006.pdf]

**S3 Table. Summary of generalized linear model (GLM) of bacterial taxa significantly affected by treatment.**

| Factor                                 | Location | Coeff.                                                                | adj-P | Taxon                                                                                                            |
|----------------------------------------|----------|-----------------------------------------------------------------------|-------|------------------------------------------------------------------------------------------------------------------|
| <i>Metarhizium*</i><br><i>Galleria</i> | Root     | -10.20                                                                | 0.03  | k_Bacteria; p_Chloroflexi; c_TK10; o_AKYG885; f_Dolo_23                                                          |
|                                        | Soil     | -4.15                                                                 | 0.04  | k_Bacteria; p_Proteobacteria; c_Gammaproteobacteria; o_Pseudomonadales; f_Moraxellaceae; g_Acinetobacter         |
|                                        |          | 8.78                                                                  | 0.01  | k_Bacteria; p_Bacteroidetes; c_Sphingobacteriia; o_Sphingobacteriales; f_Sphingobacteriaceae; g_Olivibacter      |
|                                        |          | 10.20                                                                 | 0.01  | k_Bacteria; p_Bacteroidetes; c_Sphingobacteriia; o_Sphingobacteriales; f_Sphingobacteriaceae; g_Solitalea        |
|                                        |          | 0.80                                                                  | 0.04  | k_Bacteria; p_Planctomycetes; c_Planctomycetia; o_Gemmatales; f_Isosphaeraceae                                   |
|                                        |          | 2.05                                                                  | 0.02  | k_Bacteria; p_Chloroflexi; c_Thermomicrobia; o_JG30-KF-CM45; f_un.                                               |
|                                        |          | 0.90                                                                  | 0.03  | k_Bacteria; p_Actinobacteria; c_Thermoleophila; o_Solirubrobacterales; f_un.                                     |
| <i>Metarhizium</i>                     | Root     | 3.75                                                                  | 0.01  | k_Bacteria; p_Proteobacteria; c_Gammaproteobacteria; o_Pseudomonadales; f_Moraxellaceae; g_Acinetobacter         |
|                                        |          | 5.35                                                                  | 0.02  | k_Bacteria; p_Proteobacteria; c_Alphaproteobacteria; o_Rhizobiales; f_Rhizobiaceae; g_un.                        |
|                                        |          | 3.89                                                                  | 0.03  | k_Bacteria; p_Bacteroidetes; c_Flavobacteriia; o_Flavobacteriales; f_Weeksellaceae; g_Chryseobacterium           |
|                                        |          | 5.02                                                                  | 0.04  | k_Bacteria; p_Verrucomicrobia; c_Pedosphaerae; o_Pedosphaerales; f_un.                                           |
|                                        |          | 2.82                                                                  | 0.04  | k_Bacteria; p_Proteobacteria; c_Betaproteobacteria; o_un.                                                        |
|                                        |          | 4.90                                                                  | 0.04  | k_Bacteria; p_Actinobacteria; c_Actinobacteria; o_Actinomycetales; f_Microbacteriaceae; g_Microbacterium         |
|                                        |          | 4.70                                                                  | 0.05  | k_Bacteria; p_Bacteroidetes; c_Sphingobacteriia; o_Sphingobacteriales; f_Sphingobacteriaceae; g_Sphingobacterium |
|                                        |          | 0.75                                                                  | 0.00  | k_Bacteria; p_Verrucomicrobia; c_Spartobacteria; o_Chthoniobacterales; f_Chthoniobacteraceae; g_DA101            |
|                                        | Soil     | 0.73                                                                  | 0.01  | k_Bacteria; p_Nitrospirae; c_Nitrospira; o_Nitrospirales; f_X0319.6A21; g_un.                                    |
|                                        |          | 0.70                                                                  | 0.02  | k_Bacteria; p_Proteobacteria; c_Alphaproteobacteria; o_Rhodospirillales; f_Rhodospirillaceae; g_un.              |
|                                        |          | 0.67                                                                  | 0.02  | k_Bacteria; p_Acidobacteria; c_Chloracidobacteria; o_RB41; f_un.                                                 |
|                                        |          | 0.66                                                                  | 0.02  | k_Bacteria; p_Proteobacteria; c_Deltaproteobacteria; o_Syntrophobacterales; f_Syntrophobacteraceae; g_un.        |
|                                        |          | 1.44                                                                  | 0.03  | k_Bacteria; p_Nitrospirae; c_Nitrospira; o_Nitrospirales; f_Nitrospiraceae; g_Nitrospira                         |
|                                        |          | 0.51                                                                  | 0.03  | k_Bacteria; p_Acidobacteria; c_Acidobacteria-6; o_iii1.15; f_un.                                                 |
|                                        |          | 1.00                                                                  | 0.03  | k_Bacteria; p_Proteobacteria; c_Gammaproteobacteria; o_Legionellales; f_Coxiellaceae                             |
|                                        |          | <i>Galleria</i>                                                       | Root  | 3.76                                                                                                             |
| 5.33                                   | 0.02     |                                                                       |       | k_Bacteria; p_Proteobacteria; c_Alphaproteobacteria; o_Rhizobiales; f_Rhizobiaceae; g_un.                        |
| 5.18                                   | 0.03     |                                                                       |       | k_Bacteria; p_Verrucomicrobia; c_Pedosphaerae; o_Pedosphaerales; f_un.                                           |
| 2.32                                   | 0.04     |                                                                       |       | k_Bacteria; p_Planctomycetes; c_Planctomycetia; o_Planctomycetales; f_Planctomycetaceae; g_Planctomyces          |
| Soil                                   | 6.79     |                                                                       | 0.05  | k_Bacteria; p_Acidobacteria; c_Acidobacteria-6; o_iii1-15; f_RB40                                                |
|                                        | -0.91    |                                                                       | 0.01  | k_Bacteria; p_Actinobacteria; c_Thermoleophila; o_Solirubrobacterales_un.                                        |
|                                        | -0.76    |                                                                       | 0.01  | k_Bacteria; p_Actinobacteria; c_Thermoleophila; o_Gaiellales; f_Gaiellaceae                                      |
|                                        | -0.92    |                                                                       | 0.01  | k_Bacteria; p_Proteobacteria; c_Alphaproteobacteria; o_Rhizobiales; f_Bradyrhizobiaceae; g_Bradyrhizobium        |
|                                        | -0.82    |                                                                       | 0.02  | k_Bacteria; p_Actinobacteria; c_Thermoleophila; o_Solirubrobacterales; f_Solirubrobacteraceae                    |
|                                        | -1.48    |                                                                       | 0.02  | k_Bacteria; p_Chloroflexi; c_Thermomicrobia; o_JG30-KF-CM45; f_un.                                               |
|                                        | -0.64    |                                                                       | 0.03  | k_Bacteria; p_Planctomycetes; c_Planctomycetia; o_Gemmatales; f_Gemmataceae; g_un.                               |
|                                        | -0.68    |                                                                       | 0.03  | k_Bacteria; p_Chloroflexi; c_Ellin6529_un.                                                                       |
|                                        | 0.49     |                                                                       | 0.03  | k_Bacteria; p_Acidobacteria; c_Chloracidobacteria; o_RB41; f_un.                                                 |
|                                        | -0.69    |                                                                       | 0.03  | k_Bacteria; p_Proteobacteria; c_Alphaproteobacteria; o_Rhizobiales; f_Hyphomicrobiaceae; g_Rhodoplanes           |
|                                        | -0.577   |                                                                       | 0.04  | k_Bacteria; p_Bacteroidetes; c_Sphingobacteriia; o_Sphingobacteriales; f_Sphingobacteriaceae; g_Solitalea        |
|                                        | -0.45    |                                                                       | 0.04  | k_Bacteria; p_Actinobacteria; c_Acidimicrobia; o_Acidimicrobiales; f_C111; g_un.                                 |
|                                        | -1.62    |                                                                       | 0.04  | k_Bacteria; p_Actinobacteria; c_Actinobacteria; o_Actinomycetales; f_Frankiaceae; g_un.                          |
| 1.15                                   | 0.05     | k_Bacteria; p_Proteobacteria; c_Deltaproteobacteria; o_NB1.j; f_NB1.i |       |                                                                                                                  |

Coeff. = GLM ( $\alpha = 0.05$ ) coefficient; adj-P = FDR-adjusted P value; un. = unclassified
