# Supplementary material for: Plant microbiome analysis after Metarhizium amendment reveals increases in abundance of plant growth-promoting organisms and maintenance of disease-suppressive soil
Source: PubMed Central journal article supplement (PMC7147777; doi:10.1371/journal.pone.0231150), 2020-04-10
Supplement: pone.0231150.s007.pdf [file pone.0231150.s007.pdf]

**S4 Table. Summary of generalized linear model (GLM) of fungal taxa significantly affected by treatment.**

| Factor                                 | Location | Coeff.                                                                             | adj-P | Taxon                                                                                                                                   |
|----------------------------------------|----------|------------------------------------------------------------------------------------|-------|-----------------------------------------------------------------------------------------------------------------------------------------|
| <i>Metarhizium*</i><br><i>Galleria</i> | Root     | -9.79                                                                              | 0.05  | k_Fungi;p_Ascomycota;c_Sordariomycetes;o_Sordariales;f_Chaetomiaceae;g_Chaetomium                                                       |
|                                        | Soil     | -3.88                                                                              | 0.00  | k_Fungi;p_Ascomycota;c_Sordariomycetes;o_Sordariales;f_Chaetomiaceae;g_Chaetomium                                                       |
|                                        |          | 3.90                                                                               | 0.01  | k_Fungi;p_Ascomycota;c_Sordariomycetes;o_Hypocreales;f_Hypocreaceae                                                                     |
|                                        |          | -10.20                                                                             | 0.02  | k_Fungi;p_Chytridiomycota;c_Rhizophlyctidomycetes;o_Rhizophlyctidales;f_Rhizophlyctidaceae;g_Rhizophlyctis                              |
|                                        |          | -2.81                                                                              | 0.03  | k_Fungi;p_Ascomycota;c_Sordariomycetes;o_Sordariales;f_Chaetomiaceae                                                                    |
|                                        |          | 7.82                                                                               | 0.04  | k_Fungi;p_Basidiomycota;c_Tremellomycetes;o_Filobasidiales;f_Piskurozymaceae                                                            |
| -5.61                                  | 0.05     | k_Fungi;p_Ascomycota;c_Sordariomycetes;o_Hypocreales;f_Hypocreaceae; g_Trichoderma |       |                                                                                                                                         |
| <i>Metarhizium</i>                     | Root     | 3.83                                                                               | 0.00  | k_Fungi;p_Basidiomycota;c_Agaricomycetes;o_Russulales;f_Stephanosporaceae                                                               |
|                                        |          | -4.57                                                                              | 0.04  | k_Fungi;p_Basidiomycota;c_Agaricomycetes; f_un.                                                                                         |
|                                        |          | -0.95                                                                              | 0.05  | k_Fungi;p_Ascomycota;c_Sordariomycetes;o_Hypocreales;f_Nectriaceae; g_Ilyonectria                                                       |
|                                        | Soil     | 6.27                                                                               | 0.03  | k_Fungi;p_Basidiomycota;c_Agaricomycetes;o_Hymenochaetales;f_Schizoporaceae                                                             |
| <i>Galleria</i>                        | Root     | 3.33                                                                               | 0.01  | k_Fungi;p_Basidiomycota;c_Agaricomycetes;o_Russulales;f_Stephanosporaceae                                                               |
|                                        | Soil     | -5.60                                                                              | 0.04  | k_Fungi;p_Chytridiomycota; c_Chytridiomycetes; o_un.                                                                                    |
|                                        |          | 4.08                                                                               | 0.04  | k_Fungi;p_Basidiomycota;c_Cystobasidiomycetes;o_Erythrobasidiales;f_Erythrobasidiales_famIncertaesedis;g_Sakaguchia                     |
|                                        |          | -1.90                                                                              | 0.04  | k_Fungi;p_Ascomycota;c_Sordariomycetes;o_Chaetosphaeriales;f_Chaetosphaeriaceae                                                         |
|                                        |          | -5.15                                                                              | 0.03  | k_Fungi;p_Ascomycota;c_Dothideomycetes;o_Pleosporales;f_Phaeosphaeriaceae                                                               |
|                                        |          | 7.42                                                                               | 0.03  | k_Fungi;p_Zygomycota;c_Mucoromycotina_cls_Incertae_sedis;o_Mucorales;f_Cunninghamellaceae;<br>g_Cunninghamella;s_Cunninghamella_elegans |

Coeff. = GLM ( $\alpha = 0.05$ ) coefficient; Adj-P = FDR-adjusted P value; un. = unclassified
