# Supplementary material for: Plant microbiome analysis after Metarhizium amendment reveals increases in abundance of plant growth-promoting organisms and maintenance of disease-suppressive soil
Source: PubMed Central journal article supplement (PMC7147777; doi:10.1371/journal.pone.0231150), 2020-04-10
Supplement: pone.0231150.s008.pdf [file pone.0231150.s008.pdf]

**S5 Table. Bacterial taxa significantly affected by *Metarhizium robertsii* amendment determined by Welch's t-test.**

| Comparison         | Location | Effect Size | adj-P                    | Taxon                                                                                                      |
|--------------------|----------|-------------|--------------------------|------------------------------------------------------------------------------------------------------------|
| M+ I- vs.<br>M- I- | Soil     | -2.98       | 0.02                     | k_Bacteria;p_Actinobacteria;c_Acidimicrobiia;o_Acidimicrobiales; f_C111                                    |
|                    |          | -2.10       | 0.02                     | k_Bacteria;p_Actinobacteria;c_Thermoleophilia;o_Solirubrobacterales; f_un.                                 |
|                    |          | -2.43       | 0.03                     | k_Bacteria;p_Chloroflexi;c_Thermomicrobia;o_JG30-KF-CM45; f_un.                                            |
|                    |          | -2.77       | 0.03                     | k_Bacteria;p_Planctomycetes;c_Planctomycetia;o_Gemmatales;f_Gemmataceae                                    |
|                    |          | -2.43       | 0.03                     | k_Bacteria;p_Planctomycetes;c_Planctomycetia;o_Gemmatales;f_Isosphaeraceae                                 |
|                    |          | -2.29       | 0.03                     | k_Bacteria;p_Verrucomicrobia;c_Spartobacteria;o_Chthoniobacterales;f_Chthoniobacteraceae;g_DA101           |
|                    |          | -2.22       | 0.04                     | k_Bacteria;p_Actinobacteria;c_MB-A2-108;o_0319-7L14; f_un.                                                 |
|                    |          | -2.10       | 0.04                     | k_Bacteria;p_Latescibacteria(WS3);c_PRR-12;o_Sediment-1;f_PRR-10                                           |
|                    |          | -1.99       | 0.04                     | k_Bacteria;p_Proteobacteria;c_Alphaproteobacteria;o_Rhodospirillales;f_Rhodospirillaceae                   |
|                    |          | -2.03       | 0.04                     | k_Bacteria;p_Proteobacteria;c_Alphaproteobacteria;o_Sphingomonadales;f_Sphingomonadaceae;g_Kaistobacter    |
|                    |          | Root        | 6.33                     | 0.00                                                                                                       |
|                    | 3.03     |             | 0.03                     | k_Bacteria;p_Proteobacteria;c_Alphaproteobacteria;o_Rhizobiales;f_Bradyrhizobiaceae; g_[Bradyrhizobium]    |
|                    | 2.57     |             | 0.04                     | k_Bacteria;p_Chloroflexi; c_Anaerolineae;o_SBR1031;f_A4b                                                   |
|                    | -4.13    |             | 0.01                     | k_Bacteria;p_Actinobacteria;c_Actinobacteria;o_Actinomycetales;f_Promicromonosporaceae;g_Promicromonospora |
|                    | -2.56    |             | 0.03                     | k_Bacteria;p_Actinobacteria;c_Actinobacteria;o_Actinomycetales;f_Actinosynnemataceae                       |
|                    | -1.96    |             | 0.04                     | k_Bacteria;p_Actinobacteria;c_Actinobacteria;o_Actinomycetales;f_Microbacteriaceae                         |
|                    | -2.57    | 0.04        | k_Bacteria;p_Firmicutes; |                                                                                                            |
| M+ I+ vs.<br>M- I+ | Soil     | -2.97       | 0.01                     | k_Bacteria;p_Verrucomicrobia; c_Spartobacteria;o_Chthoniobacterales;f_Chthoniobacteraceae;g_DA101          |
|                    |          | -3.40       | 0.01                     | k_Bacteria;p_Proteobacteria;c_Deltaproteobacteria;o_Syntrophobacterales;f_Syntrophobacteraceae             |
|                    |          | -2.86       | 0.02                     | k_Bacteria;p_Nitrospirae; c_Nitrospira;o_Nitrospirales;f_0319-6A21                                         |
|                    |          | -2.48       | 0.03                     | k_Bacteria;p_Proteobacteria;c_Alphaproteobacteria;o_Rhodospirillales;f_Rhodospirillaceae; g_un.            |
|                    |          | -2.05       | 0.05                     | k_Bacteria; p_Acidobacteria; c_Chloracidobacteria; o_RB41; f_un.                                           |

Significant taxa determined by pairwise Welch's t-tests with an FDR-adjusted P value adjusted (adj-P;  $\alpha = 0.05$ )
