# Supplementary material for: Plant microbiome analysis after Metarhizium amendment reveals increases in abundance of plant growth-promoting organisms and maintenance of disease-suppressive soil
Source: PubMed Central journal article supplement (PMC7147777; doi:10.1371/journal.pone.0231150), 2020-04-10
Supplement: pone.0231150.s009.pdf [file pone.0231150.s009.pdf]

**S6 Table. Fungal taxa significantly affected by *Metarhizium robertsii* amendment determined by Welch's t-test.**

| Comparison         | Location | Effect Size | adj-P | Taxon                                                                                                                                     |
|--------------------|----------|-------------|-------|-------------------------------------------------------------------------------------------------------------------------------------------|
| M+ I- vs.<br>M- I- | Soil     | 2.88        | 0.02  | k_Fungi;p_Ascomycota;c_Sordariomycetes;o_Hypocreales;f_Clavicipitaceae                                                                    |
|                    |          | 2.64        | 0.02  | k_Fungi;p_Chytridiomycota; c_Chytridiomycetes; o_un.                                                                                      |
|                    |          | -2.04       | 0.03  | k_Fungi;p_Basidiomycota;c_Agaricomycetes;o_Agaricales;f_Hygrophoraceae;g_Hygrocybe                                                        |
|                    |          | 2.03        | 0.04  | k_Fungi;p_Ascomycota;c_Sordariomycetes;o_Sordariales;f_Chaetomiaceae                                                                      |
|                    |          | 2.04        | 0.04  | k_Fungi;p_Chytridiomycota;c_Chytridiomycetes;o_Spizellomycetales;f_Spizellomycetaceae;g_Spizellomyces                                     |
|                    |          | -2.04       | 0.04  | k_Fungi;p_Ascomycota;c_Geoglossomycetes;o_Geoglossales;f_Geoglossaceae;g_Trichoglossum                                                    |
|                    |          | -2.28       | 0.04  | k_Fungi;p_Ascomycota;c_Geoglossomycetes;o_Geoglossales;f_un.                                                                              |
|                    |          | -1.92       | 0.05  | k_Fungi;p_Basidiomycota;c_Microbotryomycetes;o_Heterogastridiales;f_Heterogastridiaceae;g_Pycnopulvinus                                   |
|                    |          | 2.88        | 0.02  | k_Fungi;p_Ascomycota;c_Sordariomycetes;o_Hypocreales;f_Clavicipitaceae                                                                    |
|                    | Root     | -5.50       | 0.01  | k_Fungi;p_Basidiomycota;c_Agaricomycetes;o_Russulales;f_Stephanosporaceae                                                                 |
| M+ I+ vs.<br>M- I+ | Soil     | -2.38       | 0.03  | k_Fungi;p_Ascomycota;c_Pezizomycetes;o_Pezizales;f_Ascobolaceae                                                                           |
|                    |          | -2.16       | 0.04  | k_Fungi;p_Zygomycota;c_Mucoromycotina_cls_Incertae_sedis;o_Mucorales;f_Cunninghamellaceae;<br>g_Cunninghamella;s_[Cunninghamella_elegans] |
|                    | Root     | -1.86       | 0.05  | k_Fungi;p_Ascomycota;c_Leotiomycetes;o_Helotiales_famIncertaesedis; f_un.                                                                 |

Significant taxa determined by pairwise Welch's t-tests with an FDR-adjusted P value adjusted (adj-P;  $\alpha = 0.05$ )
