# Supplementary material for: Plant microbiome analysis after Metarhizium amendment reveals increases in abundance of plant growth-promoting organisms and maintenance of disease-suppressive soil
Source: PubMed Central journal article supplement (PMC7147777; doi:10.1371/journal.pone.0231150), 2020-04-10
Supplement: pone.0231150.s010.pdf [file pone.0231150.s010.pdf]

**S7 Table. Bacterial taxa significantly affected by *Galleria mellonella* treatment determined by Welch's t-test.**

| Comparison         | Location | Effect Size | adj-P | Taxon                                                                                                            |
|--------------------|----------|-------------|-------|------------------------------------------------------------------------------------------------------------------|
| I+ M- vs.<br>I- M- | Soil     | -2.03       | 0.03  | k_Bacteria; p_Bacteroidetes; c_Sphingobacteriia; o_Sphingobacteriales; f_Sphingobacteriaceae; g_Olivibacter      |
|                    | Root     | -4.16       | 0.01  | k_Bacteria;p_Proteobacteria;c_Alphaproteobacteria;o_Ellin329; f_un.                                              |
|                    |          | 2.35        | 0.02  | k_Bacteria;p_Bacteroidetes;c_Flavobacteriia;o_Flavobacteriales;f_[Weeksellaceae];g_Chryseobacterium              |
|                    |          | -2.45       | 0.02  | k_Bacteria;p_Bacteroidetes;c_[Saprospirae];o_[Saprospirales];f_Chitinophagaceae;g_Niastella                      |
|                    |          | -3.59       | 0.02  | k_Bacteria;p_Proteobacteria;c_Alphaproteobacteria;o_Rhizobiales;f_Rhizobiaceae;g_Shinella                        |
|                    |          | 2.85        | 0.03  | k_Bacteria;p_Proteobacteria;c_Gammaproteobacteria;o_Legionellales;f_Coxiellaceae;g_Aquicella                     |
|                    |          | 1.93        | 0.03  | k_Bacteria;p_Firmicutes;c_Bacilli;o_Bacillales;f_Bacillaceae;g_Bacillus                                          |
|                    |          | 1.88        | 0.04  | k_Bacteria;p_Verrucomicrobia;c_[Spartobacteria];o_[Chthoniobacteriales];f_[Chthoniobacteraceae];g_Chthoniobacter |
|                    |          | 2.49        | 0.04  | k_Bacteria;p_Armatimonadetes;c_[Fimbriimonadia];o_[Fimbriimonadales];f_[Fimbriimonadaceae];g_Fimbriimonas        |
|                    |          | 2.35        | 0.04  | k_Bacteria;p_Actinobacteria;c_Actinobacteria;o_Actinomycetales;f_Sporichthyaceae                                 |
|                    |          | -2.22       | 0.05  | k_Bacteria;p_Acidobacteria;c_[Chloracidobacteria];o_RB41                                                         |
|                    |          | -2.55       | 0.05  | k_Bacteria;p_Firmicutes;c_Clostridia;o_Clostridiales;f_Ruminococcaceae                                           |
|                    |          | -2.17       | 0.05  | k_Bacteria;p_Verrucomicrobia;c_Verrucomicrobiae;o_Verrucomicrobiales;f_Verrucomicrobiaceae                       |
| I+ M+ vs.<br>I- M+ | Soil     | -0.92       | 0.01  | k_Bacteria; p_Proteobacteria; c_Alphaproteobacteria; o_Rhizobiales; f_Bradyrhizobiaceae; g_Bradyrhizobium        |
|                    |          | 3.42        | 0.01  | k_Bacteria; p_Actinobacteria; c_Thermoleophilia; o_Solirubrobacteriales; g_un.                                   |
|                    |          | 2.69        | 0.02  | k_Bacteria; p_Actinobacteria; c_Thermoleophilia; o_Gaiellales; f_Gaiellaceae; g_un.                              |
|                    |          | 2.21        | 0.04  | k_Bacteria;p_Proteobacteria;c_Alphaproteobacteria;o_Rhizobiales;f_Hyphomicrobiaceae                              |

Significant taxa determined by pairwise Welch's t-tests with an FDR-adjusted P value adjusted (adj-P;  $\alpha = 0.05$ )
