# Supplementary material for: Plant microbiome analysis after Metarhizium amendment reveals increases in abundance of plant growth-promoting organisms and maintenance of disease-suppressive soil
Source: PubMed Central journal article supplement (PMC7147777; doi:10.1371/journal.pone.0231150), 2020-04-10
Supplement: pone.0231150.s011.pdf [file pone.0231150.s011.pdf]

**S8 Table. Fungal taxa significantly affected by *Galleria mellonella* treatment determined by Welch's t-test.**

| Comparison         | Location | Effect Size | adj-P                                                                                                           | Taxon                                                                                                      |
|--------------------|----------|-------------|-----------------------------------------------------------------------------------------------------------------|------------------------------------------------------------------------------------------------------------|
| I+ M- vs.<br>I- M- | Soil     | -2.39       | 0.03                                                                                                            | k_Fungi;p_Ascomycota;c_Geoglossomycetes;o_Geoglossales;f_Geoglossaceae;g_Trichoglossum                     |
|                    |          | -2.06       | 0.04                                                                                                            | k_Fungi;p_Basidiomycota;c_Microbotryomycetes;o_Heterogastridiales;f_Heterogastridiaceae;g_Pycnopulvinus    |
|                    |          | 2.48        | 0.04                                                                                                            | k_Fungi;p_Chytridiomycota;c_Rhizophlyctidomycetes;o_Rhizophlyctidales;f_Rhizophlyctidaceae;g_Rhizophlyctis |
|                    |          | 2.91        | 0.04                                                                                                            | k_Fungi;p_Ascomycota;c_Sordariomycetes;o_Hypocreales;f_Hypocreaceae                                        |
|                    |          | -2.61       | 0.04                                                                                                            | k_Fungi;p_Ascomycota;c_Eurotiomycetes;o_Chaetothyriales;f_Chaetothyriaceae                                 |
|                    | -1.84    | 0.05        | k_Fungi;p_Ascomycota;c_Archaeorhizomycetes;o_Archaeorhizomycetales;f_Archaeorhizomycetaceae;g_Archaeorhizomyces |                                                                                                            |
|                    | Root     | 2.53        | 0.05                                                                                                            | k_Fungi;p_Ascomycota;c_Sordariomycetes;o_Sordariales;f_Chaetomiaceae;g_Chaetomium                          |
|                    |          | -3.05       | 0.01                                                                                                            | k_Fungi;p_Basidiomycota;c_Agaricomycetes;o_Russulales;f_Stephanosporaceae                                  |
| I+ M+ vs.<br>I- M+ | Soil     | 1.83        | 0.04                                                                                                            | k_Fungi;p_Ascomycota;c_Sordariomycetes;o_Sordariales;f_Chaetomiaceae;g_Chaetomium                          |
|                    |          | -2.06       | 0.05                                                                                                            | k_Fungi;p_Kickxellomycota;c_Kickxellomycetes;o_Kickxellales;f_un                                           |

Significant taxa determined by pairwise Welch's t-tests with an FDR-adjusted P value adjusted (adj-P;  $\alpha = 0.05$ )
