# Supplementary material for: Plant microbiome analysis after Metarhizium amendment reveals increases in abundance of plant growth-promoting organisms and maintenance of disease-suppressive soil
Source: PubMed Central journal article supplement (PMC7147777; doi:10.1371/journal.pone.0231150), 2020-04-10
Supplement: pone.0231150.s012.pdf [file pone.0231150.s012.pdf]

**S9 Table. Dry weight measurements for bean plants from disease-suppressive soil assay.**

|                                             | Dry weight (g) |              |             |
|---------------------------------------------|----------------|--------------|-------------|
| Autoclaved soil                             | Root           | Phyllosphere | Total       |
| Bean                                        | 0.12 ± 0.01    | 0.47 ± 0.08  | 0.59 ± 0.09 |
| Bean + <i>Fusarium</i>                      | 0.12 ± 0.04    | 0.52 ± 0.10  | 0.64 ± 0.13 |
| Bean + <i>Fusarium</i> + <i>Metarhizium</i> | 0.11 ± 0.04    | 0.50 ± 0.11  | 0.61 ± 0.14 |
| Microbiome soil                             | Root           | Phyllosphere | Total       |
| Bean                                        | 0.08 ± 0.02    | 0.35 ± 0.10  | 0.43 ± 0.12 |
| Bean + <i>Fusarium</i>                      | 0.13 ± 0.03    | 0.50 ± 0.06  | 0.63 ± 0.07 |
| Bean + <i>Fusarium</i> + <i>Metarhizium</i> | 0.11 ± 0.02    | 0.52 ± 0.08  | 0.63 ± 0.08 |

Plants were treated with *Fusarium solani* f. sp. *phaseoli* with or without *Metarhizium robertsii* and grown in microbiome soil or autoclaved soil for 14 days. There was no significant difference between the conditions (ANOVA,  $p > 0.05$ ;  $n=3$ ).
