# Supplementary material for: Plant microbiome analysis after Metarhizium amendment reveals increases in abundance of plant growth-promoting organisms and maintenance of disease-suppressive soil
Source: PubMed Central journal article supplement (PMC7147777; doi:10.1371/journal.pone.0231150), 2020-04-10
Supplement: pone.0231150.s013.pdf [file pone.0231150.s013.pdf]

**S10 Table. Proportional distribution of *Fusarium* species OTUs.**

| <i>Fusarium</i> species (match percent)  | Number of OTUs | Total <i>Fusarium</i> OTUs | Percentage of total <i>Fusarium</i> OTUs |
|------------------------------------------|----------------|----------------------------|------------------------------------------|
| <i>Fusarium_brasiliense</i> (100)        | 17             |                            | 0.009%                                   |
| <i>Fusarium_keratoplasticum</i> (100)    | 3              |                            | 0.002%                                   |
| <i>Fusarium_neocosmosporiellum</i> (100) | 2              |                            | 0.001%                                   |
| <i>Fusarium_oxysporum</i> (100)          | 184063         | 187,666                    | 98.080%                                  |
| <i>Fusarium_poae</i> (100)               | 1              |                            | 0.001%                                   |
| <i>Fusarium_solani</i> (100)             | 2429           |                            | 1.294%                                   |
| <i>Fusarium_unclassified</i> (100)       | 1151           |                            | 0.613%                                   |
